# Supplementary material for: The good, the bad, and the ugly: Evolutionary and pathological aspects of gene dosage alterations
Source: PubMed Central journal article supplement (PMC8659298; doi:10.1371/journal.pgen.1009906), 2021-12-09
Supplement: pgen.1009906.s001.pdf [file pgen.1009906.s001.pdf]

## Dosage Compensation in various species

related to Figure 2, also see Supporting Information of [1]

| Species [Reference]                 | System | Dosage Compensation (Footnotes)           |
|-------------------------------------|--------|-------------------------------------------|
| <i>Homo sapiens</i> [2,3]           | XY     | X inactivation, translation upregulation? |
| <i>Mus musculus</i> [2,3]           | XY     | X inactivation, translation upregulation? |
| <i>Monodelphis domestica</i> [2]    | XY     | complete                                  |
| <i>Ornithorhynchus anatinus</i> [2] | XY     | none                                      |
| <i>Gallus gallus</i> [4]            | ZW     | none <sup>1</sup>                         |
| <i>Corvus corone</i> [5]            | ZW     | none                                      |
| <i>Ficedula albicollis</i> [6]      | ZW     | none                                      |
| <i>Poecilia parae</i> [7]           | XY     | complete                                  |
| <i>Gasterosteus aculeatus</i> [8]   | XY     | none <sup>2</sup>                         |
| <i>Cynoglossus semilaevis</i> [9]   | ZW     | incomplete, 1.3x chromosome-wide?         |
| <i>Anolis carolinensis</i> [10]     | XY     | complete                                  |
| <i>Basiliscus vittatus</i> [11]     | XY     | incomplete <sup>3</sup>                   |
| <i>Varanus komodoensis</i> [12]     | ZW     | none                                      |
| <i>Apalone spinifera</i> [13]       | ZW     | sometimes complete <sup>4</sup>           |
| <i>Sistrurus miliarius</i> [14]     | ZW     | none                                      |
| <i>Artemia franciscana</i> [15]     | ZW     | complete                                  |
| <i>Drosophila melanogaster</i> [16] | XY     | complete <sup>5</sup>                     |
| <i>Anopheles gambiae</i> [17]       | XY     | complete                                  |
| <i>Themira minor</i> [16]           | XY     | complete <sup>6</sup>                     |
| <i>Glossina morsitans</i> [16]      | XY     | complete                                  |
| <i>Teleopsis dalmanni</i> [18]      | XY     | incomplete                                |
| <i>Xenos vesparum</i> [19]          | XY     | partial                                   |
| <i>Tribolium castaneum</i> [20]     | XY     | complete <sup>7</sup>                     |
| <i>Acyrtosiphon pisum</i> [21]      | X0     | complete                                  |
| <i>Papilio xuthus/machaon</i> [22]  | ZW     | complete                                  |
| <i>Bombyx mori</i> [22]             | ZW     | complete                                  |
| <i>Plodia interpunctella</i> [22]   | ZW     | complete                                  |
| <i>Manduca sexta</i> [23]           | ZW     | complete                                  |
| <i>Schistosoma mansoni</i> [24]     | ZW     | complete / none <sup>8</sup>              |

<sup>1</sup> Compensation is achieved by maintaining Y-linked copies of dosage-sensitive genes

<sup>2</sup> Compensation is achieved by maintaining Y-linked copies of dosage-sensitive genes

<sup>3</sup>  $n=10$  genes only analyzed, most exhibit compensation, but do not equalize to females levels

<sup>4</sup> Environmentally and developmentally plastic, sometimes tissue-specific, various modes

<sup>5</sup> Many studies, MSL complex-mediated Histone H4 K16 acetylation responsible for upregulation.

<sup>6</sup> Mild upregulation in females and downregulation in males compared to the proto-X levels.

<sup>7</sup> some studies indicate upregulation in XY males and from both XX in females

<sup>8</sup> complete in certain developmental stages, no compensation in others.

|                                     |    |                                     |
|-------------------------------------|----|-------------------------------------|
| <i>Caenorhabditis elegans</i> [25]  | X0 | complete <sup>9</sup>               |
| <i>Silene latifolia</i> [26,27]     | XY | complete / incomplete <sup>10</sup> |
| <i>Silene pseudotites</i> [28]      | XY | none                                |
| <i>Silene otites</i> [28]           | ZW | partial                             |
| <i>Rumex rothschildianus</i> [29]   | XY | incomplete                          |
| <i>Coccinia grandis</i> [30]        | XY | complete <sup>11</sup>              |
| <i>Cannabis sativa</i> [31]         | XY | complete <sup>11</sup>              |
| <i>Pristionchus pacificus</i> [32]  | X0 | complete                            |
| <i>Oncorhynchus mykiss</i> [33]     | XY | incomplete                          |
| <i>Lucilia cuprina</i> [34]         | XY | complete                            |
| <i>Halyomorpha halys</i> [35]       | XY | complete                            |
| <i>Homalodisca vitripennis</i> [35] | XY | complete                            |
| <i>Oncopeltus fasciatus</i> [35]    | XY | complete                            |
| <i>Bos taurus</i> [36]              | XY | complete                            |
| <i>Taeniopygia guttata</i> [37]     | ZW | incomplete                          |
| <i>Charadrius alexandrinus</i> [38] | ZW | incomplete                          |
| <i>Sylvia communis</i> [39]         | ZW | incomplete                          |
| <i>Heliconius melpomene</i> [40]    | ZW | partial                             |
| <i>Cydia pomonella</i> [41]         | ZW | dosage balance <sup>12</sup>        |

---

<sup>9</sup> downregulation of each hermaphrodite X chromosome by 50%

<sup>10</sup> different conclusions in the two studies

<sup>11</sup> more extensive analyses needed

<sup>12</sup> ZZ dampening in males to match Z levels of females, but incomplete.

## References

1. Palmer DH, Rogers TF, Dean R, Wright AE. How to identify sex chromosomes and their turnover. *Mol Ecol*. 2019;28: 4709–4724.
2. Julien P, Brawand D, Soumillon M, Necsulea A, Liechti A, Schütz F, et al. Mechanisms and evolutionary patterns of mammalian and avian dosage compensation. *PLoS Biol*. 2012;10: e1001328.
3. Wang Z-Y, Leushkin E, Liechti A, Ovchinnikova S, Mößinger K, Brüning T, et al. Transcriptome and translatoe co-evolution in mammals. *Nature*. 2020;588: 642–647.
4. Zimmer F, Harrison PW, Dessimoz C, Mank JE. Compensation of Dosage-Sensitive Genes on the Chicken Z Chromosome. *Genome Biol Evol*. 2016;8: 1233–1242.
5. Wolf JB, Bryk J. General lack of global dosage compensation in ZZ/ZW systems? Broadening the perspective with RNA-seq. *BMC Genomics*. 2011;12: 91.
6. Uebbing S, Künstner A, Mäkinen H, Ellegren H. Transcriptome sequencing reveals the character of incomplete dosage compensation across multiple tissues in flycatchers. *Genome Biol Evol*. 2013;5: 1555–1566.
7. Metzger DCH, Sandkam BA, Darolti I, Mank JE. Rapid Evolution of Complete Dosage Compensation in *Poecilia*. *Genome Biol Evol*. 2021;13. doi:10.1093/gbe/evab155
8. White MA, Kitano J, Peichel CL. Purifying Selection Maintains Dosage-Sensitive Genes during Degeneration of the Threespine Stickleback Y Chromosome. *Mol Biol Evol*. 2015;32: 1981–1995.
9. Chen S, Zhang G, Shao C, Huang Q, Liu G, Zhang P, et al. Whole-genome sequence of a flatfish provides insights into ZW sex chromosome evolution and adaptation to a benthic lifestyle. *Nat Genet*. 2014;46: 253–260.
10. Marin R, Cortez D, Lamanna F, Pradeepa MM, Leushkin E, Julien P, et al. Convergent origination of a *Drosophila*-like dosage compensation mechanism in a reptile lineage. *Genome Res*. 2017;27: 1974–1987.
11. Acosta A, Suárez-Varón G, Rodríguez-Miranda LA, Lira-Noriega A, Aguilar-Gómez D, Gutiérrez-Mariscal M, et al. Corytophanids Replaced the Pleurodont XY System with a New Pair of XY Chromosomes. *Genome Biol Evol*. 2019;11: 2666–2677.
12. Rovatsos M, Reháč I, Velenský P, Kratochvíl L. Shared Ancient Sex Chromosomes in Varanids, Beaded Lizards, and Alligator Lizards. *Mol Biol Evol*. 2019;36: 1113–1120.
13. Bista B, Wu Z, Literman R, Valenzuela N. Thermosensitive sex chromosome dosage compensation in ZZ/ZW softshell turtles, *Apalone spinifera*. *Philos Trans R Soc Lond B Biol Sci*. 2021;376: 20200101.
14. Vicoso B, Emerson JJ, Zektser Y, Mahajan S, Bachtrog D. Comparative sex chromosome genomics in snakes: differentiation, evolutionary strata, and lack of global dosage compensation. *PLoS Biol*. 2013;11: e1001643.
15. Huylmans AK, Touns MA, Macon A, Gammerdinger WJ, Vicoso B. Sex-Biased Gene Expression and Dosage Compensation on the *Artemia franciscana* Z-Chromosome. *Genome Biol Evol*. 2019;11: 1033–1044.
16. Vicoso B, Bachtrog D. Numerous transitions of sex chromosomes in Diptera. *PLoS Biol*.

2015;13: e1002078.

17. Rose G, Krzywinska E, Kim J, Revuelta L, Ferretti L, Krzywinski J. Dosage Compensation in the African Malaria Mosquito *Anopheles gambiae*. *Genome Biol Evol.* 2016;8: 411–425.
18. Baker RH, Narechania A, DeSalle R, Johns PM, Reinhardt JA, Wilkinson GS. Spermatogenesis Drives Rapid Gene Creation and Masculinization of the X Chromosome in Stalk-Eyed Flies (Diopsidae). *Genome Biol Evol.* 2016;8: 896–914.
19. Mahajan S, Bachtrog D. Partial dosage compensation in Strepsiptera, a sister group of beetles. *Genome Biol Evol.* 2015;7: 591–600.
20. Whittle CA, Kulkarni A, Extavour CG. Absence of a Faster-X Effect in Beetles (*Tribolium*, Coleoptera). *G3* . 2020;10: 1125–1136.
21. Richard G, Legeai F, Prunier-Leterme N, Bretaudeau A, Tagu D, Jaquiéry J, et al. Dosage compensation and sex-specific epigenetic landscape of the X chromosome in the pea aphid. *Epigenetics Chromatin.* 2017;10: 30.
22. Huylmans AK, Macon A, Vicoso B. Global Dosage Compensation Is Ubiquitous in Lepidoptera, but Counteracted by the Masculinization of the Z Chromosome. *Mol Biol Evol.* 2017;34: 2637–2649.
23. Smith G, Chen Y-R, Blissard GW, Briscoe AD. Complete dosage compensation and sex-biased gene expression in the moth *Manduca sexta*. *Genome Biol Evol.* 2014;6: 526–537.
24. Picard MAL, Vicoso B, Roquis D, Bulla I, Augusto RC, Arancibia N, et al. Dosage Compensation throughout the *Schistosoma mansoni* Lifecycle: Specific Chromatin Landscape of the Z Chromosome. *Genome Biol Evol.* 2019;11: 1909–1922.
25. Strome S, Kelly WG, Ercan S, Lieb JD. Regulation of the X chromosomes in *Caenorhabditis elegans*. *Cold Spring Harb Perspect Biol.* 2014;6. doi:10.1101/cshperspect.a018366
26. Muyle A, Zemp N, Deschamps C, Mousset S, Widmer A, Marais GAB. Rapid de novo evolution of X chromosome dosage compensation in *Silene latifolia*, a plant with young sex chromosomes. *PLoS Biol.* 2012;10: e1001308.
27. Papadopulos AST, Chester M, Ridout K, Filatov DA. Rapid Y degeneration and dosage compensation in plant sex chromosomes. *Proc Natl Acad Sci U S A.* 2015;112: 13021–13026.
28. Martin H, Carpentier F, Gallina S, Godé C, Schmitt E, Muyle A, et al. Evolution of Young Sex Chromosomes in Two Dioecious Sister Plant Species with Distinct Sex Determination Systems. *Genome Biol Evol.* 2019;11: 350–361.
29. Crowson D, Barrett SCH, Wright SI. Purifying and Positive Selection Influence Patterns of Gene Loss and Gene Expression in the Evolution of a Plant Sex Chromosome System. *Mol Biol Evol.* 2017;34: 1140–1154.
30. Fruchard C, Badouin H, Latrasse D, Devani RS, Muyle A, Rhoné B, et al. Evidence for Dosage Compensation in *Coccinia grandis*, a Plant with a Highly Heteromorphic XY System. *Genes* . 2020;11. doi:10.3390/genes11070787
31. Prentout D, Razumova O, Rhoné B, Badouin H, Henri H, Feng C, et al. An efficient

RNA-seq-based segregation analysis identifies the sex chromosomes of *Cannabis sativa*. *Genome Res.* 2020;30: 164–172.

32. Albritton SE, Kranz A-L, Rao P, Kramer M, Dieterich C, Ercan S. Sex-biased gene expression and evolution of the x chromosome in nematodes. *Genetics.* 2014;197: 865–883.
33. Hale MC, McKinney GJ, Thrower FP, Nichols KM. Evidence of sex-bias in gene expression in the brain transcriptome of two populations of rainbow trout (*Oncorhynchus mykiss*) with divergent life histories. *PLoS One.* 2018;13: e0193009.
34. Davis RJ, Belikoff EJ, Scholl EH, Li F, Scott MJ. no blokes Is Essential for Male Viability and X Chromosome Gene Expression in the Australian Sheep Blowfly. *Curr Biol.* 2018;28: 1987–1992.e3.
35. Pal A, Vicoso B. The X Chromosome of Hemipteran Insects: Conservation, Dosage Compensation and Sex-Biased Expression. *Genome Biol Evol.* 2015;7: 3259–3268.
36. Ka S, Ahn H, Seo M, Kim H, Kim JN, Lee H-J. Status of dosage compensation of X chromosome in bovine genome. *Genetica.* 2016;144: 435–444.
37. Itoh Y, Melamed E, Yang X, Kampf K, Wang S, Yehya N, et al. Dosage compensation is less effective in birds than in mammals. *J Biol.* 2007;6: 2.
38. Moghadam HK, Harrison PW, Zachar G, Székely T, Mank JE. The plover neurotranscriptome assembly: transcriptomic analysis in an ecological model species without a reference genome. *Mol Ecol Resour.* 2013;13: 696–705.
39. Sigeman H, Ponnikas S, Videvall E, Zhang H, Chauhan P, Naurin S, et al. Insights into Avian Incomplete Dosage Compensation: Sex-Biased Gene Expression Coevolves with Sex Chromosome Degeneration in the Common Whitethroat. *Genes .* 2018;9. doi:10.3390/genes9080373
40. Walters JR, Hardcastle TJ, Jiggins CD. Sex Chromosome Dosage Compensation in *Heliconius* Butterflies: Global yet Still Incomplete? *Genome Biol Evol.* 2015;7: 2545–2559.
41. Gu L, Walters JR, Knipple DC. Conserved Patterns of Sex Chromosome Dosage Compensation in the Lepidoptera (WZ/ZZ): Insights from a Moth Neo-Z Chromosome. *Genome Biol Evol.* 2017;9: 802–816.
